# Supplementary material
Source: PubMed Central journal article supplement (PMC8733866)
Supplement: jamadermatol-e215390-s001.pdf [file jamadermatol-e215390-s001.pdf]

## Supplementary Online Content

Creadore A, Desai S, Alloo A, et al. Clinical characteristics, disease course, and outcomes of patients with acute generalized exanthematous pustulosis in the US. *JAMA Dermatol*. Published online January 5, 2022. doi:10.1001/jamadermatol.2021.5390

**eTable 1.** Study Definitions

**eTable 2.** Cases by Institution

This supplementary material has been provided by the authors to give readers additional information about their work.

**eTable 1. Study Definitions**

|                           |                                                                                                                                                                                                                                                                                                                                                                                                                                                                                                                                                                  |
|---------------------------|------------------------------------------------------------------------------------------------------------------------------------------------------------------------------------------------------------------------------------------------------------------------------------------------------------------------------------------------------------------------------------------------------------------------------------------------------------------------------------------------------------------------------------------------------------------|
| Free-text Search Terms    | “AGEP”, “Acute Generalized Exanthematous Pustulosis” (as well as “Exenthamatous”, “Exanthamatous”, “Exenthematous” to account for potential misspelling), “generalized pustulosis”, “pustular drug eruption”, “pustular drug rash”, and “toxic pustuloderma”                                                                                                                                                                                                                                                                                                     |
| AGEP Start Date           | AGEP start date was determined by earliest mention of either erythema or pustules, either patient reported or provider examined. Specific date mention, when available, was prioritized, followed by extrapolation of start date based on mention of rash time course (i.e. rash started 2 days ago).                                                                                                                                                                                                                                                            |
| AGEP End Date             | AGEP end-date was determined by availability of data to use the highest ranked choice of the following options: 1) Date of complete pustular resolution based on dermatology note, 2) Date that topical treatment (not including emollient/antimicrobial/antiviral/antifungal) was discontinued, 3) Date of complete pustular resolution based on non-dermatology note, 4) Date dermatology note states that rash (not only pustules) had resolved, 5) Date non-dermatology note states that rash (not only pustules) had resolved, 6) Discharge date, 7) Other. |
| AGEP Time Course          | The AGEP time-course, defined above, was used as the time frame during which laboratory values and clinical data were reviewed in the EMR.                                                                                                                                                                                                                                                                                                                                                                                                                       |
| Mucosal Involvement       | Mucosal involvement required the physical exam note to specifically mention either pustules or erosions on the mucosal surface.                                                                                                                                                                                                                                                                                                                                                                                                                                  |
| Fever                     | Fever was defined as recorded temperature of 38° C (100.4° F) or greater, and fever resolution was defined as recorded temperatures less than this for a full 24-hour period                                                                                                                                                                                                                                                                                                                                                                                     |
| Hematologic Abnormalities | If neutrophilia ( $\geq 7000/\text{mm}^3$ ), leukocytosis ( $>11,000/\text{mm}^3$ ), or absolute eosinophilia ( $>500/\text{mm}^3$ ) or relative eosinophilia ( $>3\%$ leukocytes) occurred within the AGEP time-course, resolution of this hematologic abnormality was defined as the value falling below these defined cutoff values for 2 consecutive blood draws.                                                                                                                                                                                            |
| Hypocalcemia              | Hypocalcemia was defined as uncorrected blood calcium $<8.4$ mg/dL.                                                                                                                                                                                                                                                                                                                                                                                                                                                                                              |
| Diabetes                  | Diabetes was defined as, in order of preference, 1) Hgb A1c $>6.5\%$ , 2) two fasting glucose $>125$ mg/dL, or 3) single glucose level $>200$ mg/dL with symptoms.                                                                                                                                                                                                                                                                                                                                                                                               |
| Chronic Kidney Disease    | Chronic kidney disease (CKD) was defined as 2 glomerular filtration rates $<60$ mL/min at least 3 months apart.                                                                                                                                                                                                                                                                                                                                                                                                                                                  |

**eTable 2.** Cases by institution

| Completing Institution                      | Cases | Percent |
|---------------------------------------------|-------|---------|
| Mass General Brigham/Harvard Medical School | 75    | 21.13%  |
| Vanderbilt University Medical Center        | 57    | 16.06%  |
| Yale University                             | 43    | 12.11%  |
| New York University                         | 36    | 10.14%  |
| University of Pennsylvania                  | 35    | 9.86%   |
| Northwell Health                            | 32    | 9.01%   |
| University of Rochester                     | 27    | 7.61%   |
| Medical College of Wisconsin                | 26    | 7.32%   |
| University of California San Francisco      | 14    | 3.94%   |
| Oregon Health Sciences University           | 9     | 2.82%   |
